# Supplementary material for: BNC1 inhibits the development and progression of gastric cancer by regulating the CCL20/JAK-STAT axis
Source: PeerJ. 2025 May 26;13:e19477. doi: 10.7717/peerj.19477 (PMC12121617; doi:10.7717/peerj.19477)
Supplement: Supplemental Information 9 [file peerj-13-19477-s009.xlsx]

## Sheet: Sheet1
	NC
No.	6Day		9Day		12Day		15Day		18Day		21Day
	width	length	width	length	width	length	width	length	width	length	width	length		6Day	9Day	12Day	15Day	18Day	21Day
89	3.6	5.8	3.8	5.9	5.7	7.1	5.2	8.8	8.6	12.7	9.3	13.7		37.584	42.598	115.34	118.976	469.646	592.457
87	4.3	4.5	4.5	4.6	5.6	5.8	5.9	6.6	8.4	9.6	10.4	10.8		41.6025	46.575	90.944	114.873	338.688	584.064
97	4.4	5.2	4.5	5.3	4.6	6.4	5.4	6.2	8.4	8.5	8.6	9.6		50.336	53.6625	67.712	90.396	299.88	355.008
77	3.6	5.3	3.8	5.4	4.8	7.6	5.5	7.8	8.2	11	7.7	11.9		34.344	38.988	87.552	117.975	369.82	352.776
99	4.3	5.3	4.5	5.5	5	8.8	6.8	10	10.1	13.7	8.7	13.7		48.9985	55.6875	110	231.2	698.768	518.476
82	5.2	5.5	5.3	5.7	5.3	7.9	6.5	9.2	9	11	8.4	11.7		74.36	80.0565	110.956	194.35	445.5	412.776
79	3.9	4.4	4	4.5	5.4	5.6	6.7	9.1	8.5	10.5	9.3	15		33.462	36	81.648	204.249	379.312	648.675
	OE
No.	6Day		9Day		12Day		15Day		18Day		21Day
	width	length	width	length	width	length	width	length	width	length	width	length		6Day	9Day	12Day	15Day	18Day	21Day
59	3.9	4	4.1	4.2	4	6.6	5.1	3.8	5.2	5.9	7.1	7.4		30.42	35.301	52.8	49.419	79.768	186.517
64	5	5.3	5.3	5.6	5.5	5.6	6.4	6.7	7.5	7.6	9.6	10.3		66.25	78.652	84.7	137.216	213.75	474.624
F55	3.3	4.1	3.4	4.2	4.2	5.6	6.3	7.5	6.7	11.3	8.5	9.7		22.3245	24.276	49.392	148.837	253.629	350.412
85	3.3	4.3	3.4	4.6	4.6	6	5.4	7.4	6.6	10.2	7.8	10.9		23.4135	26.588	63.48	107.892	222.156	331.578
93	3.9	5.1	4	5.4	4.7	5.4	4.5	8.8	7.9	9.4	8.9	10.4		38.7855	43.2	59.643	89.1	293.327	411.892
F47	3.4	3.5	3.5	3.6	4.3	5.1	4.3	7	7.7	8	7.6	10.8		20.23	22.05	47.1495	64.715	237.16	311.904
98	3.7	4.2	3.7	4.3	4.7	5.3	4.7	5.6	6.3	6.7	7.3	10.2		28.749	29.4335	58.5385	61.852	132.962	271.779
	Remarks:The left column presents the raw measurement data, while the right column shows the tumor volumes calculated using the formula described in the Methods section of the manuscript. During the first three days, subcutaneous tumors had not yet grown to a measurable or visible size, and thus, no data are included in the table for this period.
