# Supplementary material for: BNC1 inhibits the development and progression of gastric cancer by regulating the CCL20/JAK-STAT axis
Source: PeerJ. 2025 May 26;13:e19477. doi: 10.7717/peerj.19477 (PMC12121617; doi:10.7717/peerj.19477)
Supplement: Supplemental Information 10 [file peerj-13-19477-s010.xlsx]

## Sheet: Sheet1
NC	OE
0.9575	0.6885
0.8665	0.3172
1.0878	0.4479
0.6327	0.4146
0.8065	0.1995
0.4055	0.3287
0.6767	0.4365		Weight/g
