# Supplementary material for: BNC1 inhibits the development and progression of gastric cancer by regulating the CCL20/JAK-STAT axis
Source: PeerJ. 2025 May 26;13:e19477. doi: 10.7717/peerj.19477 (PMC12121617; doi:10.7717/peerj.19477)
Supplement: Supplemental Information 14 [file peerj-13-19477-s014.xls]

## Sheet: Sheet1
ITEM TO CHECK	IMPORTANCE	CHECKLIST
EXPERIMENTAL DESIGN
Definition of experimental and control groups	E	Line120, 275-277, 315-317, 320-321
Number within each group	E	Line120, 275-277, 315-317, 320-321
Assay carried out by core lab or investigator's lab?	D
Acknowledgement of authors' contributions	D
SAMPLE
Description	E	Line120
Volume/mass of sample processed	D
Microdissection or macrodissection	E	Was not performed
Processing procedure	E	Was not performed
If frozen - how and how quickly?	E	Was not performed
If fixed - with what, how quickly?	E	Was not performed
Sample storage conditions and duration (especially for FFPE samples)	E	Was not performed
NUCLEIC ACID EXTRACTION
Procedure and/or instrumentation	E	Line120-121, Line125-127
Name of kit and details of any modifications	E	Line120-121, Line125-127
Source of additional reagents used	D
Details of DNase or RNAse treatment	E	Line120-121, Line125-127
Contamination assessment (DNA or RNA)	E	Line120-121, Line125-127
Nucleic acid quantification	E	Line120-121, Line125-127
Instrument and method	E	Line120-121, Line125-127
Purity (A260/A280)	D
Yield	D
RNA integrity method/instrument	E	Line120-121, Line125-127
RIN/RQI or Cq of 3' and 5' transcripts	E	Line120-121, Line125-127
Electrophoresis traces	D
Inhibition testing (Cq dilutions, spike or other)	E	Line120-121, Line125-127
REVERSE TRANSCRIPTION
Complete reaction conditions	E	Line122-123, Line125-127
Amount of RNA and reaction volume	E	Line122-123, Line125-127
Priming oligonucleotide (if using GSP) and concentration	E	Line122-123, Line125-127
Reverse transcriptase and concentration	E	Line122-123, Line125-127
Temperature and time	E	Line122-123, Line125-127
Manufacturer of reagents and catalogue numbers	D
Cqs with and without RT	D*
Storage conditions of cDNA	D
qPCR TARGET INFORMATION
If multiplex, efficiency and LOD of each assay.	E	None
Sequence accession number	E	NCBI is available
Location of amplicon	D
Amplicon length	E	None
In silico specificity screen (BLAST, etc)	E	None
Pseudogenes, retropseudogenes or other homologs?	D
Sequence alignment	D
Secondary structure analysis of amplicon	D
Location of each primer by exon or intron (if applicable)	E	None
What splice variants are targeted?	E	None
qPCR OLIGONUCLEOTIDES
Primer sequences	E	Line127
RTPrimerDB Identification Number	D
Probe sequences	D**
Location and identity of any modifications	E	None
Manufacturer of oligonucleotides	D
Purification method	D
qPCR PROTOCOL
Complete reaction conditions	E	Line123-127
Reaction volume and amount of cDNA/DNA	E	Line123-127
Primer, (probe), Mg++ and dNTP concentrations	E	Line123-127
Polymerase identity and concentration	E	Line123-127
Buffer/kit identity and manufacturer	E	Line123-127
Exact chemical constitution of the buffer	D
Additives (SYBR Green I, DMSO, etc.)	E	Line123-127
Manufacturer of plates/tubes and catalog number	D
Complete thermocycling parameters	E	Line123-127
Reaction setup (manual/robotic)	D
Manufacturer of qPCR instrument	E	Line123-127
qPCR VALIDATION
Evidence of optimisation (from gradients)	D
Specificity (gel, sequence, melt, or digest)	E	None
For SYBR Green I, Cq of the NTC	E	None
Standard curves with slope and y-intercept	E	None
PCR efficiency calculated from slope	E	Line125-127
Confidence interval for PCR efficiency or standard error	D
r2 of standard curve	E	None
Linear dynamic range	E	None
Cq variation at lower limit	E	None
Confidence intervals throughout range	D
Evidence for limit of detection	E	None
If multiplex, efficiency and LOD of each assay.	E	None
DATA ANALYSIS
qPCR analysis program (source, version)	E	Line125-129
Cq method determination	E	None
Outlier identification and disposition	E	None
Results of NTCs	E	Line128-129
Justification of number and choice of reference genes	E	Line128-129
Description of normalisation method	E	Line128-129
Number and concordance of biological replicates	D
Number and stage (RT or qPCR) of technical replicates	E	Line254-255
Repeatability (intra-assay variation)	E	Line254-255
Reproducibility (inter-assay variation, %CV)	D
Power analysis	D
Statistical methods for result significance	E	Line254-259
Software (source, version)	E	Line254-259
Cq or raw data submission using RDML	D
Table 1. MIQE checklist for authors, reviewers and editors. All essential information (E) must be submitted with the manuscript. Desirable
information (D) should be submitted if available. If using primers obtained from RTPrimerDB, information on qPCR target, oligonucleotides,
protocols and validation is available from that source.
*: Assessing the absence of DNA using a no RT assay is essential when first extracting RNA. Once the sample has been validated as
RDNA-free, inclusion of a no-RT control is desirable, but no longer essential.
**: Disclosure of the probe sequence is highly desirable and strongly encouraged. However, since not all commercial pre-designed assay
vendors provide this information, it cannot be an essential requirement. Use of such assays is advised against.
